# Supplementary material for: Reducing refusals of care through improved personal care interactions between caregivers and people with dementia: protocol for a realist synthesis
Source: HighWire-hosted journal article supplement (doi:10.1136/bmjopen-2024-088149), 2024-08-01
Supplement: bmjopen-2024-088149supp001_data_supplement.pdf [file bmjopen-2024-088149supp001_data_supplement.pdf]

Supplementary file

MAIN SEARCH

|               |                                                                                                                                                                                                                                       |
|---------------|---------------------------------------------------------------------------------------------------------------------------------------------------------------------------------------------------------------------------------------|
| Dementia      | "Dementia" "Alzheimer*" "Cognitive decline"<br>"Cognitive impair*" "Lewy bod*"                                                                                                                                                        |
| Personal care | "personal care" "ADLs" "activities of daily living"<br>"bath*" "shower*" "wash*" "toilet*" "dress*"<br>"morning routine" "shav*" "eat*" "medication*"<br>"drink*" "nail*" "hair" "care" "teeth" "oral hygiene"<br>"skin care" "feed*" |
| Refusals      | "resistan*" "refus*" "reject*" "non-complian*"<br>"noncomplian*" "complian*"<br>"uncooperative" "obstreperous" "accept*"                                                                                                              |

((("Dementia" or "Alzheimer\*" or "Cognitive decline" or "Cognitive impair\*" or "Lewy bod\*") and ("personal care" or "ADLs" or "activities of daily living" or "bath\*" or "shower\*" or "wash\*" or "toilet\*" or "dress\*" or "morning routine" or "shav\*" or "eat\*" or "medication\*" or "drink\*" or "nail\*" or "hair" or "care" or "teeth" or "oral hygiene" or "skin care" or "feed\*") and ("resistan\*" or "refus\*" or "reject\*" or "non-complian\*" or "noncomplian\*" or "complian\*" or "uncooperative" or "obstreperous" or "accept\*")))

DATABASES:

- OVID MEDLINE
- OVID EMBASE
- EBSCO PsycINFO
- EBSCO CINAHL Ultimate
- CENTRAL - Cochrane Central Register of Controlled Trials
- Web of Science Social Sciences Citation Index™.

LIMITS:

- Year 2000 onwards
- English language
- Human
